# Supplementary material for: A prebiotic diet modulates microglial states and motor deficits in α-synuclein overexpressing mice
Source: eLife. 2022 Nov 8;11:e81453. doi: 10.7554/eLife.81453 (PMC9668333; doi:10.7554/eLife.81453)
Supplement: Supplementary file 3. [file elife-81453-supp3.xlsx]

## Sheet: SN
List of genes detected in SN		List of genes detected in STR
Adamts1		Tmsb4x
Ccl3		Actb
Ccl4		Fau
Slc15a3		Rpl21
Nfkbiz		Rpl35a
Btg2		Rplp1
H3f3b		Rps12
Gm3448		Rps29
Nfkbia		Rps16
Hpgd		Rpl34
Cd9		Rpl30
B2m		Rpl13
Ubc		Selenop
Egr1		Rps11
Bcl2a1b		Gng5
Trib1		Rps21
B930036N10Rik		Gapdh
Rps24		Rps3
Atf3		Rpl14
Ier2		Rps9
Scoc		Rps24
Atf4		Rps10
Rpl32		Rpl19
Rhob		Rpl28
Neat1		Rpl11
Ercc5		Rps14
Eif4a1		Rpl41
Cited2		Rps20
Rps29		Eef1a1
Btg1		Rps27
Qpct		Rpl9
Marcksl1		Rps7
Ccl2		Rps5
Tlr2		Rpl17
Ccdc86		Sh3bgrl3
Hmgb2		Rpl37a
Zfp36l1		Cox8a
Otud1		Rps15a
Ccl12		Rplp0
Hist1h4d		Rpl7
Rps19		Hebp1
Zfp36		Atp5e
Ccrl2		Trem2
Tnf		Rpl39
Rgs2		Rps23
Sowahc		Rpl15
Cd83		Rpl26
Med21		Rpl27a
Errfi1		Cyba
Egr3		Gnai2
Rpl39		Rpl23
Arsb		Marcks
Junb		Basp1
Ftl1		Rps13
Id2		Rpl10
Gm10138		Rpl18
Ccl6		Rps28
Hspe1		Rplp2
Tmem176a		Arpc2
Rps26		Tpt1
Tmem176b		Rpl5
Ier3		Hpgd
Etv3		Rpl36a
Spty2d1		Eef1b2
Tuba1b		Rpl36
Tgif1		Rpl32
Lsp1		Rps19
Arf4		Rpl35
Pfkfb3		B2m
Il1a		Bri3
Rpl29		Rpsa
Tmsb10		Rpl12
Rpl24		H2afz
Dek		Rps18
Rps27l		Hint1
Vmp1		Calm1
Gpx1		Rpl23a
D830025C05Rik		Pmepa1
Ranbp1		Uqcr11
Cd52		Rps17
Emp3		Tubb5
C3ar1		Gngt2
Pcna		Cox7b
Clec5a		Rac2
Gm10762		Rack1
Gapdh		Klk8
A930007I19Rik		Rpl10a
Ccnl1		Crybb1
Calm1		Ctsd
Ppp1r15a		Cd9
Tubb5		Rps15
Cebpd		Nsa2
Gcnt2		Rpl4
Bst2		Nfe2l2
Slc3a2		Cebpzos
Herpud1		Sec61g
Gpr84		Gnas
Arl4c		Sec61b
Hist1h1c		Smdt1
Ehd4		Ltc4s
Arl6ip1		Eif3j1
Slamf9		Dynll1
Gnl3		Oxct1
Hivep3		Rps6
Kdm6b		Rps2
Ddx3x		Fcrls
H2afz		Ldha
Sall3		Rpl31
Cstb		Ptms
Ddx21		Ccl6
Slc25a4		Tmem176b
Rlim		Set
Zfand5		Pdap1
Cadm1		Slc2a5
Ccnd1		B230219D22Rik
Tnfaip8		Atp5k
Actg1		Rpl29
Hist1h1e		Hsp90b1
Sat1		Sdf2l1
Tmem230		Ctsb
Eif1a		Tmem160
H2-K1		Canx
Nsrp1		Nucks1
H2-DMa		Thrsp
Chka		Tuba1a
Mif		Ranbp1
Nop56		Sirt2
Dnajc3		Bax
Eif3j1		Dek
Mt1		Gpx1
Rpl41		Lst1
Kctd12		Ramp1
Ctsb		Bcl2a1b
Degs1		H2-DMa
Plk3		Ctsz
Tspo		Romo1
Hist1h2ae		Scoc
Mrpl33		Tnfrsf13b
Hmgn1		Ighm
Nabp1		Lap3
Nhlrc3		Hspe1
Rpl22l1		P4hb
Maml2		Cd52
Kansl1		Mif
Bcl2a1a		Tspo
Kras		Phgdh
Cdc5l		Mid1ip1
Tmsb4x		Cstb
Smc3		Mtpn
Runx1		Xlr
Sars		Tmsb10
Gm37305		Cacybp
Sdf2l1		Tmem100
Ncf2		Ndufa1
Lyz2		Cebpd
Hebp1		Ms4a6d
Edem1		Atp5g3
Ier5		Uqcc2
Taf7		Khdrbs3
Lrrfip1		Cd63
Cox7b		Arsb
Lrif1		Rtn4rl1
Hspa5		Chrac1
Abcg1		Cysltr1
Nrp1		Pnrc2
Nfia		Fam110a
Slmap		Eef2
Sgk1		Camk2n1
Nol7		Hdgf
Nap1l1		Tmem176a
Socs3		Tpi1
Jun		Ube2m
Glyr1		Vegfb
Rap2a		Ndufc1
Tyrobp		Prorsd1
Cd63		Llph
Ppig		Clec5a
Prpf40a		Ralbp1
Atp6v1e1		Yae1d1
Hexim1		Tnfaip8
Myc		Bst2
Nucks1		Ifi27
Ccl9		Dnajc3
Mat2a		Fth1
Arpc5l		Hspd1
Hspd1		Serpinf1
Picalm		Fkbp3
Cisd2		Srek1ip1
Ubxn4		Rab10
Stk17b		Ptp4a2
Dnajb1		Magt1
Ranbp2		Ik
Utp11		Ccl9
Dnttip2		Aup1
Brd4		Ang
Olfml3		Maf
Hif1a		Thoc7
Cdkn1b		Snrpg
Rabepk		Aimp1
Zfp622		Gas6
Pbrm1		Cdc5l
Vezf1		Dynlt3
Fth1		Wbp4
C87436		Anxa3
Ddit3		Arrdc3
Phgdh		Lactb
Fam111a		Fcgr2b
Rdx		Twistnb
Rgs1		Clec4a3
Selenop		Hpf1
Slamf6		Mindy2
Scpep1		Nap1l1
Capg		H2afj
H2-D1		Ms4a6b
Fam46c		Chchd1
Milr1		H2afv
Thoc7		Zfp24
Rab10		Hmgb2
Twistnb		Rtn1
Gm47794		Rap2a
Gm9484		Cebpb
Plek		Filip1l
2010107E04Rik		Eif4ebp2
Abcd2		4931406C07Rik
Mid1ip1		Kras
Cox6c		Bola2
Sox4		2310033P09Rik
Gpr65		Abcf1
Acox3		A930007I19Rik
Lgals3bp		Cetn2
Znrf2		Luc7l3
Sec31a		Mrpl33
Nupr1		Rapsn
Pla2g4a		Lsp1
Kcnj2		Hif1a
Nsun6		Lat2
Tcim		Anp32b
Zc3h15		Fam114a2
Hivep2		Soat1
Bcl10		Trim12a
Mb21d1		Dnajc2
Nus1		Tubb4b
Il13ra1		Rp9
Eprs		Lyz2
Prkd3		Fam102b
Rnf19b		Dynll2
Upf3b		Spint1
Icam1		Anp32e
Pdcd5		Cir1
Ndufa1		Wdr61
Tpi1		AC160336.1
Smc6		Slc1a3
Higd1a		Lactb2
Crlf2		Ccnd1
Etf1		Hmgn2
Hist1h2be		Scd2
Pmp22		Rad21
Med12l		Cd3eap
Ctss		Dusp7
Xlr		C3ar1
Pdgfa		Cnot6l
Hmgn2		Tnfsf12
Tcerg1		Cryba4
Chmp2a		Csnk2a2
Romo1		Tagln2
Gm36839		Ccdc59
Snrpd1		Scn1b
Cst3		Zbtb7a
Sod1		Ctsl
Klf6		Bicd2
Ube2d3		Parp1
Coq10b		Cx3cr1
Ubb		Trim30a
Tnfsf13b		Rtf1
Trim33		Plxna4os1
Magt1		Hspb3
Mcl1		Slamf9
Nsa2		Nfic
Ckap4		Ubash3b
Fnip1		Polr2a
Naa20		Cd34
Ipcef1		Herpud1
Igsf6		Emp3
Selenow		Prdx4
Tmem160		Dnajc5
Snrnp27		Hnrnpul1
Calr		Rasgrp3
Rad21		H2-T23
Creld2		Scaf11
Nop58		Gpr84
Hsp90aa1		Nrp1
Tmem106b		Prpf40a
Pdia4		Lrrfip1
Peli1		Pdcd6ip
Ywhag		Epsti1
Smdt1		Eid1
Ddi2		Tspan18
Lpl		Psmd1
Rfc1		Tbl1x
Fam168a		2510009E07Rik
Ap3b1		Msl3
Ppp1r3b		Ybx3
Ddx3y		Ankrd49
Gm10260		Ndufaf8
Hhex		Nupr1
Srp19		Lrif1
Lysmd3		Fam111a
Impact		Dpy19l4
Mid1		Ssrp1
Mrpl17		Slc40a1
Nudt4		Secisbp2l
Sap30		Npl
Fcrls		Zcchc17
Kif5b		Ipo11
Cep152		Mrpl9
Gnl2		Chtop
Pkm		Capg
Actn4		Nmi
Prdx4		Lag3
Ccar1		Aaed1
Cysltr1		Rfc1
Gatm		Sp110
Snx30		Etv1
Cebpa		Add3
Lipa		Gtf3c6
St8sia6		Crebrf
Mafb		Med21
Snrpc		Tab2
Cript		Trim30d
Egr2		Dnajb14
Gmfg		Fam168a
Cdkn1a		Pttg1
Hsp90ab1		Ppig
Zfp703		Eif1a
Bmpr2		Sod1
Slc16a3		Dusp3
Tln2		Rbm43
Brd2		Ccr6
Mir142hg		Tmf1
Dnajc2		Stk10
Adrb1		Psap
Eif3a		Ppil4
Rasgrp3		Hook3
Cpeb2		Igtp
Ankrd49		Zfp260
C1qbp		Irf2bp2
Fli1		Mgme1
Acsl1		Dtx3l
Ik		Slamf6
Fkbp3		Atp6v1a
Mphosph8		Gclm
Txnip		Zbtb38
Zyx		Ufl1
Gpr183		Sec63
Ccr6		Hnrnpul2
Myo1c		Brd3
Dusp3		Cdk5r1
Chd1		App
Irf2bpl		Qpct
Fam217b		Stat3
Ndufb3		Fam76a
Uso1		Gm42670
Lrba		Efcab14
Siah2		Slbp
Rbms1		Endod1
Smarca5		Mymk
Btbd19		2610528A11Rik
Clec2d		Ctnna1
BC003331		Zfp950
Zfp120		Nolc1
Dnajb14		Ndufaf4
Zfp770		Ccdc174
Anxa5		Vps36
Tagap		Bmpr2
Cxcl16		Camk1d
Ccdc88a		Brd4
Fxyd5		Ckap4
Tnfrsf21		Polr2l
Tbl1x		Cdca7
Nipbl		H2-Oa
Zzz3		H2-M3
C5ar1		Ppp4r3b
Myo5a		Zfp397
Arid4a		Dnajc1
Azin1		Gaa
Pgk1		Creb3l2
Pik3ca		Anxa5
Llph		Numa1
Timp2		BC003331
Kif2a		Nop56
Hnrnpul2		Mybbp1a
Kin		Crlf2
Trmt10a		Coa6
Iscu		Fundc2
Lmo4		Slc39a10
Ybx3		Nsrp1
Camk1d		Slc26a2
Mrpl51		Tcof1
Tmem123		Ndufaf2
Eea1		Cd83
Npl		Glrx
Ufl1		Supt16
Rest		Mrpl21
Ube2s		Colgalt1
Brd3		Trmt6
Tmem168		Naa50
Rpf1		Bcl2a1a
Map3k2		Mtap
Rtf1		2900093K20Rik
Fnbp4		Pbrm1
Tmem119		Pilra
Rybp		Slc38a1
Crybb1		Zfp800
Asxl2		Selenow
Tmem245		Smc1a
Smc1a		Thap2
Emsy		Zfp120
Tpm3-rs7		Keap1
Zcchc9		Smc6
AU020206		Mcm3
Prdx6		Oaf
Rsf1		Pbxip1
Anp32b		Desi2
Casp8ap2		Nus1
Gimap6		Rnasel
Atp6v1d		Igsf8
Map3k8		Ms4a6c
Tpm4		Cask
Plekho2		Nudt4
Fgfr1op		Edem1
Topors		Nfatc1
Cdk6		Adam17
Smim3		Tnfrsf17
Rps6ka3		Gstm5
Bhlhe41		Zyg11b
Apobr		Glg1
Hdgf		Gm37494
Sec63		Bzw2
0610030E20Rik		Calu
Grap		Hcst
H2-DMb1		Ttc28
Diaph1		Kif2a
Zhx1		Itpripl2
Kpna3		Pcp4
Zc3h13		Cdv3
Zfp292		Csad
Tmem41b		Gkap1
Slc20a1		Pianp
Fam129a		Pdzd8
Socs6		Alkbh5
Camk2n1		Tmpo
Gadd45g		Ppm1l
Hist2h2ac		Gatm
Arid4b		Appl1
Sfi1		C5ar1
Akap8		Lyar
Hist1h3e		Pnn
Dnajb9		Smarcc1
Tpp2		Arid5b
Slc12a2		Larp4b
Zfp62		Ak6
Plau		Trim8
Rad50		C5ar2
Trim30a		Chpt1
4921524J17Rik		Borcs8
Irak1		Irgm2
Ifi27		Gatad2b
Ppard		Fnip1
Pnpla8		Acsl4
Ids		Phf20
Ssna1		Slc17a5
Cox20		Cadm1
Uqcr10		Sel1l
Prkar2a		Terf2ip
Alkbh5		Cdkn1c
Eri1		Ube2s
Slc1a3		Gtpbp4
Ppan		Larp7
Dusp6		Gm10260
Iws1		Npepps
Tbc1d9		Nxt2
Bcl2l11		Hmgn3
Soat1		Lias
Atg12		Gm38843
Psmd1		Smim8
Kmt2a		Lpgat1
Nolc1		Smc3
Kmt5a		Rest
Pdap1		AW112010
Tuba1a		Actn1
Phip		Peli1
Smurf2		Rfc3
Acat1		Tigd2
Mrps18c		Zfp322a
Tmcc1		Rcan1
Stip1		Kat6a
Dnajc21		Trim5
Usp37		Pdgfa
Pitpnc1		Kif5b
Zfp451		Med13
Trmt6		Mb21d1
Naalad2		Samhd1
Slbp		Mt1
Ssrp1		Fra10ac1
Sdc3		Slc43a2
Tmem167		Dbt
Bfar		9930021J03Rik
Glipr1		Nup50
Atp6v1h		Irf9
Polr1a		Gbp7
Rwdd4a		Lmbrd2
Sptan1		Vcpip1
Suz12		Cxcl16
Bod1l		Manea
2310033P09Rik		Gclc
Peak1		Larp1
Eid1		Nop58
Aplp2		Smarca5
Lst1		Ceacam1
Zbtb7a		Gm20045
Zbtb1		Casc4
Naa50		Borcs7
Arid5a		Upf3a
Sys1		Zbtb1
4933433G15Rik		Maml2
Ppp1r3d		9930111J21Rik2
Mrps33		Pno1
Nop14		Lgals1
Gtf2h5		Trnt1
Gtpbp4		Ppp6r1
Ylpm1		Rprd1a
Tob2		Hmgxb4
Supt6		Ppwd1
Kif3b		Cep57
Ppp1r15b		Ckap5
Pdik1l		Zfp703
Brd7		Bank1
Mybbp1a		Nit1
Ftsj3		Dnajc28
Plin2		Ap3b1
H2afj		Eif4g1
Fam76a		Ctr9
Ints13		Pitpnc1
Txn1		Tmem230
Gars		Rap2b
Wdr12		Serf1
Irf1		AU019823
Mga		Clgn
D5Ertd579e		Ywhaz
Ctsl		Ttc32
Ctnna1		Eif4g3
Gem		Zmym5
Pdia6		Npnt
Baz1b		Haspin
Otud4		AL590144.2
AI504432		Ncoa3
Tec		Fcrl1
Gabpb2		Gnl3
Ino80b		Bmi1
Srek1ip1		Klhl23
Arid5b		Samd8
Rnf6		Poc1b
Pik3r1		Ddx3y
9930021J03Rik		Irgm1
Lpp		Rasa1
Fbxo33		Zfr
Cse1l		Gid4
Nek6		Bend6
Odc1		Nucb2
Tep1		Aplp2
Upf3a		Lpp
Pan3		Lpar6
Rnf150		Tceal9
Borcs7		Fam217b
Pdgfb		Etaa1
Tars		Rrs1
Ddx52		Txnrd1
Zfr		Cdkn2aip
Sh3kbp1		Cdc42ep3
Fam46a		Tmem57
Proser1		Igsf6
Mttp		Sp1
Taf1		Plau
Gm2237		C130013H08Rik
Txlng		Crkl
Tgs1		Irak1
Chrac1		Suz12
Osm		Rnf168
Pbdc1		Ddx21
Tmf1		Casp3
BC005561		Wdr12
Nfkbid		Tpm4
Psmd14		Gprasp2
B230219D22Rik		Slc12a2
Fam208b		Zfp518a
Ebi3		Dtd1
Hist1h3d		Syt11
S1pr1		Eva1a
Nfat5		Apobec3
Rnf103		2510002D24Rik
Aaed1		Prkx
Tcf12		Bhlhe41
Rcan1		Dync1h1
Phf11b		Abcd2
Gm42418		Tmem144
Cpsf2		Kmt5a
Fubp1		Bmp2k
Rapgef2		Top2b
Rbm34		Mrps22
Rassf4		Rpp38
Smarcc1		Hmox1
Dennd1b		Ralgps2
Rif1		Osbpl8
Tbrg1		Tnf
Tceal9		Ikbip
Slc38a1		Osbpl1a
Usmg5		Hacd4
Mak16		4930589L23Rik
B4galt6		Mphosph8
Hist4h4		Cyb5r3
Fosl2		Snhg12
Rbm27		Hivep3
Eif5b		Rab20
Fbxw7		Nfia
Crebrf		Znrd1as
Trim56		Mfhas1
Mia3		Chd3os
St8sia4		Atf6
Ndufaf7		Gm3448
Fam50a		Taok1
Ndufaf8		Hlf
Txnrd1		Actr6
Bmt2		Eif5b
Nsd2		Lrrcc1
Atp2c1		Rps6ka3
Mphosph10		Zfp329
Mdn1		Pdik1l
Zfp780b		3830403N18Rik
Smarce1		Mycbp
Dyrk2		Plxna4
Sp110		Cnn2
Dnajc25		Pacsin1
Nucb2		Icam1
Lcorl		Ccdc34
Gcnt1		Rangap1
Tuba1c		Angel2
Etv1		H1f0
Lima1		Plpp3
Tagln2		S100a1
Mindy2		Mitd1
Appl1		Tfe3
Dbt		Zfp131
Rictor		Foxp1
Nrp2		Emsy
1500011K16Rik		Prkcq
Spidr		Mphosph10
Tmem100		Klhl5
Thoc2		Psat1
Cfdp1		Ccdc80
Cpd		Stmn1
Camk2g		Angptl7
Ggta1		Rrp1b
Actl6a		Clmp
Utp14a		Stab2
Tnfaip1		Rrm2b
Aimp1		G0s2
Catip		Gpatch11
Ralbp1		Sfxn1
Tnfrsf13b		Lig1
Larp4b		N6amt1
Frrs1		Tle3
Il16		Helz
Rilpl1		Tnfsf13b
Gm28187		Ppat
Hmox1		Ubxn2a
Rab39		Cpsf2
Lag3		Ift74
Aida		Lrrc39
Tsc22d3		Gm16062
Bdp1		Adssl1
Ss18		Gm17259
Arhgap15		Mcm6
Rad23a		Kitl
Cdk14		Fmr1nb
Ilf2		Rassf4
Rb1cc1		Cep170
Gm26669		1500015A07Rik
Ncl		5730455P16Rik
Rbpms		Psip1
Knop1		Cks2
Nasp		Fxyd5
Zfp281		Usp1
Ncbp3		AY074887
Zfp318		Cwc25
Ly9		Mpp5
Cenpb		Smim13
Gar1		Ripk1
Gabarapl1		Klhl28
Arsk		Mnat1
Cdca4		Pxmp4
I830077J02Rik		Sox4
Pds5b		Milr1
Rnf121		Tctex1d4
Zc3h8		Ccdc91
Neurl3		Stard4
Xpo1		Zhx1
Trnau1ap		Celf1
Tmpo		Sowahc
Tlnrd1		Phactr1
Braf		Ctnnal1
Ttc3		Pole3
Pogk		Stk26
Spint1		Eri1
Baz1a		Fndc3b
Aig1		Ank
Lias		Tlr2
Fndc3b		Pknox1
Gm10382		Sms
Kitl		Slc7a8
Pim1		Marcksl1
Prdm1		Cfap45
Trim2		Ptrhd1
Tspyl1		Ccdc152
Pam16		Trp53i11
Tspan18		Cdkn2d
Lactb		CT025678.1
Tnfaip3		Svip
Hsp90b1		Cdk6
Pou2f2		Eif2b3
Qser1		Cenpk
Pum3		Cmc2
Bbx		Nampt
Ccdc82		Mcm7
Ankrd12		Rnf19b
Bag3		Ccdc25
Plxna4		Rufy1
Slc39a10		Pde4dip
Gm20186		Phf11d
Tma16		Rpf2
Nsf		Sike1
Ly6e		Ccdc181
Ndufa5		Snrnp35
Cers6		Csrp1
Eya4		Leo1
Herc6		Prim1
Zfp131		Spsb1
Gm42031		Hars2
Abca1		Ttc25
Dars		Triqk
Rbm15		Noc3l
Timm8b		Zfp30
Myo18a		Lats2
2510009E07Rik		Trim12c
Galnt7		Neurl3
Agpat5		Rfc4
Golgb1		Mcm4
Polr2k		2010109A12Rik
Tubb4b		Lifr
Gtf3c6		Nlk
Whamm		Fen1
Mettl16		Ablim1
Gm43936		Rab26os
Gprasp1		Card6
Prmt5		Peak1
Edn1		Zfp760
Zbtb21		Spata24
Coro2a		Afap1l1
Taf3		AC161165.6
Zbtb38		Syce1
Csf2ra		4930579G24Rik
Cnrip1		Gins3
Got2		Cox6a2
Nip7		Naip2
Slc43a2		Rbm28
Orai2		E130311K13Rik
Cep83		Gm11491
Pcmtd1		G2e3
Fam167b		Rbm34
Dapp1		Sap30
Npepps		Il7r
1810037I17Rik		Ago2
Birc3		Dnajc9
Ndufc1		AC130815.2
Atmin		Klhl31
Impdh2		Tmem237
Luzp1		Spryd7
Fgl2		Kin
Phactr2		Enc1
Dcaf5		D730045B01Rik
Zfp945		Afp
Dph5		Cpq
Ola1		Pik3ca
Prps2		Srd5a1
Slamf8		Clybl
Socs4		Gm44037
Etaa1		5730409E04Rik
Ing3		Wdr41
Hirip3		2200002D01Rik
Slc40a1		A230083N12Rik
Arrdc3		Spdl1
Hcar2		Cab39l
Pi4k2a		Mcm2
Cdk5r1		BC025920
2810004N23Rik		Mblac2
Trp53bp2		Tbc1d9
Kat6b		Zmynd8
Mysm1		Gm10734
Tsr1		Map3k19
Glrp1		Tanc1
Tmem260		Gm26884
Eny2		Etfbkmt
Tmem57		Irak3
Ms4a6c		Cks1b
Ndufb2		Ccdc60
Pycr2		Tcf19
Armcx3		Kng2
Aebp2		Zfp37
Plaa		Cbx5
Mitf		Gm31597
Creb1		Lgals3bp
Mafk		Cbx6
Oxct1		Mysm1
Dnaja1		Ddit3
Ints6		Hells
Tmem127		Tfrc
9430038I01Rik		Sh3bgrl
Naa30		Mettl5os
Rhoc		Rad50
Ankib1		Zfp296
Tbc1d1		Map10
Pnn		Htra3
Fhad1		Cenph
Fam126b		Gm26536
Dbi		Fam221a
Erg28		Spc25
Cks2		Ptcra
Rnase6		Fam133b
Banp		Sptb
Golga3		Akap12
Hint3		Fhl4
Impad1		Mthfd2
Card6		Nrn1
Rbm28		Rapgef4
Ctnnbl1		Serpinb9
Smn1		Enpp4
Sos1		Hoxb4
H2-Ob		C030034I22Rik
Cask		Gm35279
Ctse		4930539E08Rik
Oxsm		Gm26641
Zdhhc21		Ccdc69
Zbtb2		Atp8b5
Yipf6		6720427I07Rik
Haus3		Kbtbd11
Nceh1		Pkmyt1
Nav1		Anln
Dph3		Atpaf2
Wbp4		Aldh1l1
Zfp994		Rock1
Tcof1		Med13l
Slc39a6		Gm45184
Nufip2		Car9
Amn1		Glul
Ssbp3		Gm7467
Pck2		Brip1
Maged1		Washc2
Rasa2		Irf2bpl
Glrx		Iws1
Trip11		Ccdc28a
Sfxn1		Taf3
Dmxl1		Usp53
Zcchc6		Exosc2
Inpp5f		Cited2
Kbtbd3		9330102E08Rik
Ak1		Dnali1
1190002N15Rik		Rad51
Vgll4		Ccsap
Phactr4		Zfp583
Golga4		Rrm1
Cd74		Gm47438
Slc26a2		Ube2t
Elmsan1		Nhsl2
Ralgps2		Gm15510
Slc7a6os		Npr1
Zfp429		Fam60a
Mapk6		Top2a
Polg2		Birc5
Fgd4		Fkbp6
Lonrf3		Dnm3
Dcaf10		Xxylt1
Insig1		Gspt2
Pkp4		Kif24
Uhmk1		Stx17
2900060B14Rik		Gas2
AW112010		Cdca3
Pou2f1		Lockd
Camsap1		Hmmr
Iars		Bub1b
Cetn2		Mis18bp1
Rap2b		Dscc1
Acadl		Chek1
Ppwd1		Rnf20
Mterf1a		Apoc1
Nin		Gstm7
Gm37494		Nusap1
Snhg6		Mpp7
Enc1		Nr1d2
Cpne3		Fam213a
Apoe		Stk40
2810454H06Rik		Cenpb
Spen		Gm2093
Ift20		Cebpa
Dtymk		Gm14419
Lpar6		Car7
Slc16a7		Tmem40
H2-Q6		Gm32856
Sdad1		Stox2
Stat1		Rhox5
Ifi27l2a		Twsg1
Alkbh8		Ckap2l
Zbtb6		Knl1
Gkap1		Dnmt1
Ddx27		Fbxo47
S100a10		Bard1
Klhdc8b		Tsga13
Sirt1		Kifc1
Crybg3		S100a4
Cep295		Tpx2
Lrrcc1		Apold1
Ltc4s		Eno3
Larp7		B9d1
Smad5		Gm46404
Wdr75		Cdca5
Arpc1a		Cdk1
Pde4dip		Cdr2l
Gpalpp1		Gcnt1
Ints12		CT025521.2
Gm37233		Dopey2
Wwc2		Stbd1
Creb3l2		Sgo2a
Setx		Gm38414
Parp14		Aurka
Hmgcs1		Tbc1d12
Rpf2		Sh2d5
Msantd4		Gm13212
Jade1		Gm37584
Topbp1		Luzp1
Ccdc32		Traip
Ric3		Igsf10
Tsga10		Fgfbp3
Clec4a3		Edn1
S100a13		Fxyd2
Evi5		Gpm6b
Cir1		Uck2
Slc25a25		Gm10767
Csf1		S100a6
Bloc1s6os		Fignl1
Kdsr		Cenpn
Uba5		Lbr
Slc31a1		Nckap1
Riok1		Phf11b
Zcchc17		Cfap36
Sik2		Gm37748
Atr		Plk1
Tnip1		Gpr157
Hsph1		Gm45474
H2-Ab1		Utp23
Tmem144		Pecam1
Csgalnact2		Clec2h
Rfx7		Rabl6
Uba1		Cdnf
Snx4		Ercc6l
Rad17		Zwilch
Atad2		B3glct
Prdm2		Gnl3l
Gmcl1		Zfp811
C5ar2		Cenpw
Mllt6		1110020A21Rik
Sf3a3		Zfp335os
Oaf		Snrpn
Mitd1		Hist1h3c
Rpp38		Sspn
Tor3a		Ccna2
Tiparp		Cdc45
Slfn9		Gm29675
Dcp2		Cdkn3
Ext1		Syt14
Cep57		Ccnb2
Dnajb4		Inca1
Gfpt1		Tsix
Mtmr4		Trip13
Msl3		Tnfsf9
Filip1l		Ect2
Pdcd2l		Ptrh1
Brip1os		Gm3854
Lpin1		Ednrb
Fos		Isg15
Abcb4		Gm38287
Zfp800		Emp2
Kcnq1ot1		Prr11
Gabpb1		Timeless
Crim1		Uba6
Usp1		1700025G04Rik
Jmy		Dhfr
Cbx5		Cdca2
Rnf168		Gm4961
Atp11c		Kif20a
Letm1		Gm10827
Zbtb41		Gm26867
Zfp260		Fgfr1
Homer1		Cox7a1
Gm28707		Gm47096
Mrpl27		Lrrc8b
Sec23ip		Bex3
Sec61g		Mettl1
Apobec3		Klrd1
Fmnl2		Dut
Cep350		Tmc5
Atg2a		Chaf1a
Mapk8		Lancl2
Map3k4		Dnph1
Cast		A330069E16Rik
Akap9		Tlr12
Phf6		Brca1
Ing2		Stat1
Dock9		Tcf24
Igfbp4		Gm19434
Ahctf1		Yjefn3
Usf3		Ociad2
Hist1h2ac		Mkl2
Slx4ip		Gm15983
Gtf2h1		Hist1h2bm
Phf20		Hist3h2ba
Dlg1		D630045J12Rik
Itga5		Tfdp2
Zfp729b		Gm4724
Tia1		9430038I01Rik
Cntln		Slc35g2
H2afx		Smpd3
Ugp2		Gas1
Lyar		Dgkg
Mthfd2		Apob
Bri3bp		9330136K24Rik
Zfp516		Shcbp1
Haus8		Ndc80
Hist1h2ap		Cd59a
Dag1		Ncapg
Uspl1		Cdt1
Gm28809		Topors
Daam1		Stap1
Usp19		Wnk3
Nxt2		Zfp9
Kbtbd7		Maoa
Zeb1		Pdzrn4
Tctex1d2		Gpr150
Zfp69		Hamp2
2810474O19Rik		Gmnn
Tmem161b		Usp27x
Gas6		3930402G23Rik
Mtap		Tex11
Cwc25		Mt2
Ahdc1		Chml
Slk		Rad18
Zfp407		1810044D09Rik
Tmem209		Pinx1
Stk38l		Gm42669
1700020I14Rik		Cit
Hes1		Olfm1
Apc		Pole
Trim47		Hist1h2an
4931406C07Rik		Cenpf
Gm44751		Tnfrsf10b
Mxd1		F3
Rrad		Kifc5b
Rbm48		Emilin1
Vps13a		Foxm1
Anp32e		Cdkn2a
Ankrd26		BC051142
Sike1		Ltb4r2
Thap1		Umodl1
Nudt5		Ahcy
Exosc2		Trim65
Plcb2		B430219N15Rik
Pianp		Dll1
Aak1		Asf1b
Serpinf1		Gm45411
N6amt1		Sh3bp4
Mon1b		AC154507.3
Gm32849		Tedc1
Sp4		Slc16a9
Zfp639		Kctd7
Pcyt1a		Kif11
Arhgap11a		Gm4841
D10Wsu102e		Tnfrsf11a
Dzip3		Ptprg
Rangap1		Kcnc2
Ctcf		Ltv1
Epb41l3		Egln3
Adrb2		Mrc1
Cpeb4		Ablim2
Traf3		Rc3h1
Cib2		Frrs1
Slc10a7		Plcb4
Ptma		Cenpe
Gm26740		Cep41
Mical1		A430105I19Rik
Ddx10		Rgs7bp
Mettl1		Gm27166
Ms4a6b		Aph1b
Trim12a		Ccdc186
Lbr		Gm21814
Tmem43		Gm11827
Idua		Ldlrad3
Zfp738		4930471M09Rik
Rnf144b		Dlgap5
Phf11d		B230312C02Rik
Zbtb20		Gm26531
Camsap2		Chaf1b
Tmem126a		9430065F17Rik
Ttf1		Eprs
Ubac1		Cxcr2
Sos2		Crip1
Bach2		4930570B17Rik
Lztfl1		Ccdc136
Cep162		Tirap
Pdcd1		Lepr
Ttc28		3300005D01Rik
BC049352		Skint3
Yeats2		Slc2a10
Ccr5		Gm31812
Ss18l2		Ccdc78
Nsmce1		Egfl7
Zfhx2		Rorc
Poc1b		Hs3st2
Tigd2		Prkar2a
Setd7		Tlcd2
Zfp40		Gm15582
Thumpd1		Pcdh17
Zfp277		Vegfa
Htatsf1		Gpx7
Ncoa2		Peak1os
Crot		Foxd2
Gpatch4		Igdcc4
Rtca		Il23a
Hist1h2bc		1700124L16Rik
Uba6		Baiap2l2
Tbc1d23		Msi2
Dync1h1		Fabp3
Pmaip1		Abi2
Slfn2		Fzd8
Trim65		Kif2c
Myef2		Fancd2
Cmtm8		Zfp239
Stam		Tnik
Gm26825		Zfp819
Lmbrd2		Zfp981
Cryba4		Zfp287
Hyou1		Ppfia3
Lin9		Pcdhga4
Hint2		Kank2
Letm2		Ing5
Ddx43		Gm7008
Pilra		4930542C12Rik
Ptpn12		Suv39h2
Prkaa1		Cpt1c
Yae1d1		A630019I02Rik
Gm26714		Ccnb1
Nmi		Nfib
Zfp65		Gnaz
Ptrhd1		Mcm5
Zfp113		Gm5113
Cep135		Spaca1
Sgcb		A930038B10Rik
2900093K20Rik		Adrb1
Dbf4		Zc3hav1l
Diexf		Gm8013
9430060I03Rik		Gm43573
Gm26522		Zfp114
Fam204a		Sycp2l
Agl		Ndrg2
2810006K23Rik		5930430L01Rik
Zfp719		Ccnf
Ccdc186		Klf7
Zc3h12c		Dnajb7
Atg10		Tube1
C030034I22Rik		Tjp2
Man2a1		Rnf225
Sclt1		E230032D23Rik
Dopey1		Slc43a3
Arhgap31		Eps8l1
2700081O15Rik		Slc16a7
Igf1r		BC005537
Fundc2		Hyal1
Bcl6		A030001D20Rik
Smpdl3a		Ckap2
Cwc22		Gm16239
Mob1b		Procr
Tmem88		Ppp1r1b
Kif1b		Pde6g
Mettl14		Dok2
Trim30d		Tacc3
Thap8		Usp9x
Luc7l3		Mnd1
Dot1l		Mybl1
Mrpl45		Mmp2
Cfap36		Bcl2l11
Maff		Cpe
Wdr76		Racgap1
Lnpk		Ecm2
Zcchc24		Crym
Zfp950		Foxd1
Mrpl54		2310001H17Rik
Gm47015		H2-Eb1
Itpk1		N4bp3
Chchd7		Elmo3
Dr1		Zfp119b
Myo9a		Exo1
Mrpl9		Gm48876
Ubxn2a		Nkapl
Irs2		Spaar
Add3		1700041I07Rik
Gpr160		1700086P04Rik
Slc25a36		Cenps
Bms1		D830035M03Rik
Hspb3		1700019D03Rik
Helz		Mbp
Actr6		Cdca7l
Slc7a1		Tgfb2
Fam160a2		Gm17745
Itpr1		Asrgl1
Stmn1		Hipk2
Cdc25a		Cd200r4
Hist1h4h		Cage1
Chchd5		Fgf1
Hps1		Tor3a
Mcm3		BC147527
Trim36		Gm16253
Fam71a		Ccdc18
Ago3		Ubxn11
Batf3		Cd40
Nbea		Slc4a8
Nit1		Uhrf1
Smc5		Arid4a
Arl13b		D7Ertd128e
Khdrbs3		Zfp599
Stab1		B3gnt8
Zfp758		Id1
Gm13479		Arpp21
Fbxo9		Pkd2l2
Hinfp		Nek5
AU022793		Sgtb
Axl		2810425M01Rik
Fam160b2		4833413G10Rik
Dkc1		Rad51b
Dock1		Arhgef39
Myo1e		Coq4
Xaf1		Gm8113
Cpsf6		Gm19510
Lifr		Gm36028
Mmp14		F630028O10Rik
Kcnma1		Gm45479
Slc35a4		Rxfp1
Brwd3		Lrrc74b
Qsox1		Cntnap1
Mib1		Pou3f1
Ak6		AC168977.1
Sv2a		Map7
Gcc2		Eri2
Mrpl13		Cdh5
Bcorl1		Trps1
Cd274		Slc1a2
Rrm2b		Alox12
4930532G15Rik		Zc3h8
Nradd		Msr1
Hace1		Xrcc4
Npat		A730015C16Rik
Tmem106a		Xlr4c
Fam193a		Gm35507
Parp3		Vpreb1
Rock1		Gm27201
Zbtb37		Spef1
Ing5		Macrod2
Ccdc25		Gm16174
Hjurp		Myo15
Gm20045		Kantr
Il6		Tk1
Rfc3		4833403J16Rik
Pinx1		Eif2ak2
Helb		Ahr
Pvr		Cep44
Cdkn2d		Sash1
Dcaf1		Cdc7
Gm38843		Gm26710
Tyw1		Cd300lb
Csad		Dab2
Utp20		Gm45774
Abcg2		Orc6
Simc1		Slc2a9
Tmem184c		Gm42918
Slc5a3		Sh3d21
Chp1		Cdc20
Abhd17b		Cenpa
Prr5l		Alcam
Mfap1a		Myo1e
Sft2d3		Gm15417
2010013B24Rik		Gm39459
Rnf219		Cox6b2
Kcnip3		Ifi47
Zfp111		Tbc1d30
Nlk		Mirt1
Leo1		1700020D05Rik
Nenf		Kif22
Tshz1		Ccdc39
Zcchc10		Stil
Hyal1		Prrg4
R3hcc1l		Rbfox3
Msh2		Phactr2
Rhbdd2		Gnal
C730034F03Rik		Gm26566
Fam98a		Mns1
Usp36		Olfr1030
Tada2b		Rin1
Clcn5		Igfbp4
Ank		6330403K07Rik
Ifih1		D16Ertd472e
Ptch1		Tescl
Arsg		Art3
Siglecf		Gm26711
Fndc7		B4galt6
Kif3a		Clhc1
Uvssa		Impg2
Zfp944		Gm45767
Ubxn2b		Mcub
H1f0		Gm9984
Tlr3		Cc2d2a
Fry		Cecr2
Slc30a1		Pltp
Zfp410		Shtn1
Tnfrsf12a		Fam161b
Fam199x		A830009L08Rik
Cnnm3		Rarb
Prpf8		Dzip1
Ccdc71l		Gm1587
Arhgap29		Ulbp1
Limd1		Mki67
Ifi202b		Psen2
Tulp4		Upk1b
Epb41l4aos		Atp1b1
Slc44a1		AL591952.3
Nes		Dtl
Cdip1		Glyctk
Rrm1		Fabp5
Emc9		Vcan
E2f5		Gm17546
Npnt		Bbx
Arhgap24		Tcaf1
Pcgf6		Fyn
Cep290		Adra2a
Ddhd1		Heg1
Zfp607a		Zfp874b
Miga1		Pcnt
Hacd4		Pde10a
D930030I03Rik		Ccdc14
Tpr		Aurkb
Samd9l		Celsr2
Dopey2		Camsap1
Zfyve9		Neurl1b
Xylt1		Fbxl7
Spry1		Gm43569
Sin3a		Scimp
Cbfa2t3		Diaph3
Mfsd12		Oas1c
Ndufaf2		Pcdhga3
Slc4a1ap		5730422E09Rik
Uri1		Ccdc7a
B3glct		Nr1h3
Hook3		Tma16
Selenoi		Ifi44
Foxn2		Gm15612
Zfp322a		Myb
Xpc		Itgb3bp
Ddx60		Wrn
Plekhb2		Atp2b2
Atxn7		Dcaf1
Nectin4		H2-Aa
Spg7		Peli3
Zfp180		Slc7a11
Rps6ka5		Rbbp8
Polr3k		Diaph1
Fnbp1l		Ahrr
Wdr11		Sycp3
Mcee		Slamf7
Trove2		Ccdc148
Gm20342		Cenpl
Stk38		Plcxd1
Las1l		Ifi206
Lztr1		Frmd6
Rftn1		Platr29
C330018D20Rik		Ftsj3
Yod1		Irf1
Eepd1		Sdr39u1
Rhbdd3		Kctd1
Bag4		Sult6b1
Ipo11		Gm13814
Hars2		Txlnb
Anapc15		E2f1
Zfp329		Filip1
Wdr61		Arhgap6
Papolg		Gm36287
Mmp2		Taok3
Irgm1		Susd4
Fra10ac1		Trim59
Uros		Knstrn
Ezh1		Fam161a
Glrx2		Cenpp
Gpr137c		Mfsd6
Mrps31		Col9a3
Dhcr7		Cpne2
Tsc22d1		Lilra5
Pde8b		Kdm5b
Gnpda2		Cav1
Lig3		Icos
Klhl5		Efna5
Rnf24		Lmnb1
Tbcel		Eps8
Kiz		Gm6598
Arhgap18		Zc2hc1a
Slc15a2		Gm46440
Pin4		Tmem82
Esf1		Gm5475
H2afv		Dnal1
Htra3		Zfp507
Cpped1		Uaca
Chpt1		Prkaa2
Msantd2		Gnao1
Gm10093		Caprin2
Dgkh		A330084C13Rik
Slc25a20		Igf1
Dusp1		Tyms
Cfap97		Elobl
Myh10		Atp1a2
Slf1		4930548H24Rik
Trim39		Zbtb2
Dagla		Cdk18
Gm49077		Soat2
Nfyb		Klhl13
Armcx5		2610002M06Rik
Zbtb43		Samd11
Hilpda		Bcor
Zfp74		Lyzl4
Cd3eap		Tmem161b
Polr3f		Enox2
Dgcr8		4930507D05Rik
Nbeal1		Gm40557
Cdk5rap2		Gm10800
Rufy2		Rel
mt-Nd6		Klf9
G630030J09Rik		Irak1bp1
Kbtbd4		Prox2os
Abcb7		Gm47230
Mpp5		Smim10l2a
Gclm		Kif18a
Zfp846		Ung
2210016L21Rik		Mt3
Ppat		E130208F15Rik
Pecam1		1700028J19Rik
Ctnnal1		2810457G06Rik
Cdadc1		Aplp1
Nmt2		Xirp1
B230217O12Rik		Cdca8
Pms2		Fmr1
Sema4g		Ikbke
Pcnt		Spaca9
Zfp142		Ptgs2
Gm3248		Tspyl4
Ppp1r12b		Snap25
Iqgap1		Spice1
Ppm1k		Klhl33
Casp9		4930523C07Rik
Rcor3		Tmem72
Lmnb1		Dcaf17
Eif2ak2		Cish
Hspb1		Pla2g7
Phykpl		4930550C14Rik
Ide		Arid1b
Rap1gap2		Ier5l
Dhx34		Gm45495
Ccnd3		AC163720.3
A830008E24Rik		Kif20b
Liph		Pcgf2
Ptger4		Sycp2
Hcst		Ncapd2
Arl5c		Anxa2
Smad7		Alkbh8
Lgi4		Cadm4
Serf1		Fzd4
4632415L05Rik		8030474K03Rik
Tceanc2		Pbld1
Pgm2l1		Klkb1
Tmem237		Acot1
Rasl2-9		Poc1a
Rnaseh2b		A230072E10Rik
Raph1		Ldlr
Clic4		Best1
Casp4		Zcchc10
Gm5468		E230001N04Rik
Golim4		Reps2
1700066B19Rik		Gm26698
Cd79b		Neb
Ttbk2		Cd300ld3
Manea		Apobr
Tfdp2		Bivm
St3gal2		Dusp8
Gm44067		Abi3bp
Lgals1		Gm26947
Rabgef1		Chek2
C1galt1		Slc6a9
Heatr3		Gm26625
Inafm2		Dbr1
Kdr		Acsl3
Trmt10b		Mpzl3
Slc30a4		Lrrc9
Sptbn1		Cxcl14
2010109A12Rik		Olr1
Gan		Slc25a31
Hat1		Prc1
Agtpbp1		Gm12981
Lrig3		Zfp354c
Lin54		Cdc14b
Gla		Nexn
Med27		Rab11fip1
4933427D14Rik		Rab7b
Galnt3		Gm26521
Celf2		Gm28370
Emp2		C330027C09Rik
Gsto1		Smtn
Ccdc34		Gm13075
Slc24a3		Sdc4
Klf12		Nab1
Scn1b		Ctla2a
Spats2		Ppm1k
Zmat3		Lrrc28
Odf2l		Plp1
Dck		Cdr2
Gid4		Rnf17
G2e3		Myo10
Arl5b		Ankrd55
Stard8		Tgtp2
Mut		Slc25a42
Isca1		Snx16
Gdap10		Palld
Cspp1		Glipr1l3
Inpp1		Mettl25
D3Ertd254e		Csf2rb
Efnb2		Rasl11b
Ptchd1		Zfp60
Hist1h3a		Thoc2
Irf9		Elovl6
Nol8		Cdkl5
Asb10		Map9
Tyms		Kif1b
Leng9		Gdf15
Mbp		Chchd10
5730455P16Rik		Zfp72
Rbbp8		Rad51ap1
Zbtb10		Trmt10b
Zmat1		Spc24
Scamp1		Nudt6
Kctd3		Bcl2a1d
Ctsd		0610010F05Rik
Nol4l		Cspg5
Per3		Eid3
H2-Q7		Msantd1
Smc4		Gm1673
Hist1h1d		Dusp27
Invs		Wdr34
Extl2		Ogfod1
Cdc23		Vangl1
Tmem41a		Rpl39l
Zfp160		Flt1
Nup155		Nek4
Rbbp9		Nr4a2
Gnl3l		Zfp503
Rev3l		Lypd6
Cep44		Gm37800
Angptl7		Gm26737
Apaf1		Fam43a
Plk2		Alox15
Atm		Sv2c
Dna2		Map7d3
Strbp		Ifi214
Fam214a		Spon1
Msh3		Fgf2
Tipin		Dubr
Cdkn2aip		Fam212b
Ammecr1		Tmem229a
Nr1d2		Ccdc112
Pex12		Dnase1l3
Ofd1		Bcl11a
Klf7		Runx2
Smim19		Usp16
Lmln		Fam199x
Paox		Kif3b
Zfp30		F9
Zfp141		Nudt12
Tnfrsf23		Nrgn
Ccdc80		Ly6k
Gtf2f2		D3Ertd254e
Lamb2		F8
Orc6		Nrap
Tceanc		1700065D16Rik
Vps13c		Zfp36l2
Ccl25		Gm45716
Zfp949		Il4i1
Fmn1		Gm38832
Cpt1a		Asap2
Arid3a		Fam184b
Mllt3		Cdkn2c
Rnf128		Epb41l5
Dusp2		Itga10
Ttc32		Rpap3
Ino80c		Rnase6
Tada2a		Ttc23
Prkce		Dbf4
Rnf122		Gm10457
Platr25		Ccr3
Ppm1l		Il18rap
Ccdc137		Tshz1
Ccdc112		Iqch
0610040B10Rik		Gm3336
Sdc4		Dsel
Efl1		Cryab
Gpatch1		Socs2
Msi2		Zfp7
Nampt		Cxcl13
Lrrc75aos2		Prnp
Cul2		Gm48089
Cmtm4		Osgin1
N4bp2		Kif23
Zfp951		Gm42031
Fancm		Xlr4a
Slc38a6		Akap17b
Klhl23		Ccdc125
Pak4		Oas2
4930537H20Rik		Dhx29
Nos1ap		Gm31763
Ice2		Fam208a
Kif1c		Rtl5
Hist1h2bj		Unc79
Nipsnap2		Socs4
Sh3bgrl		1110035H17Rik
Mex3b		Oasl1
Mbd4		Slc39a6
Pde7a		Ppp1r3b
Micu3		Gm3558
Fzd7		Thrb
Haus2		Gm44850
Gm17259		Samd4b
Pus7		Gfod2
Taf6		Fam129a
Gm46224		Pclaf
Ibtk		Gm26797
Tapbpl		Megf11
Paip2b		Amer1
Sept6		Gbp4
Ston2		Dennd5b
Ubr7		Trove2
Kcnk9		Fktn
Zfp346		Iigp1
Wars2		Lix1
Chd6		Zfp74
Enox2		Gm4779
Ciart		Hist1h3i
Gm42435		Slc16a1
Pgm2		Zfp667
Fbxo32		Wee1
D16Ertd472e		Rragd
Rpusd4		Arl13b
Fyco1		Larp1b
Amotl1		Clec2i
Rpia		Pcdhb22
Bend6		Ppp1r3e
Sept11		Kcnk9
Hddc2		Zfp318
Gm12148		Zfp458
Cbx6		4732440D04Rik
Wwp1		Tcerg1
Zkscan8		Gbp3
Rdh11		Fam84b
Zfp873		Gm44777
Pex1		Gm15991
Hivep1		Tmem2
Xpnpep3		Parp12
Arap2		Nudt15
Baz2b		Cenpq
Rgs3		Gm42809
Incenp		Gm26734
Sec61a2		Slc2a6
Ddx58		Thap1
Slc41a1		Supt6
Ikzf2		Sh3rf1
Thrsp		Mut
Bsn		A930033M14Rik
Fam26f		Sag
Bank1		Mex3a
Borcs8		Mmp19
Nmnat1		Smc2
Itgb3bp		Tubb2a
Rapsn		Xpc
3110062M04Rik		C130026I21Rik
Zfp81		Spock1
Prkdc		Cacnb4
Spopl		A930029G22Rik
Ncdn		Lrrc2
Larp1b		Gm4117
Coq4		Arvcf
Syt11		Gm9856
Fcgr4		Ly6a
Slc2a3		Ccdc146
Gm16118		Tfcp2
Tbl2		AW146154
Atxn1		Kdm2b
Vamp1		Map3k20
Plpp3		Rpl22l1
E130311K13Rik		Phactr4
Irak3		Acot2
Dab2		Doc2g
Mtg2		Sesn3
Ercc6l2		Hgf
Thbs1		Ezr
1110002L01Rik		Il17rb
Pms1		Myef2
Spg11		Azin2
Stab2		Acbd5
Bcl2l13		Skp2
Dync1i2		Tmem154
Neurl4		Ccne2
Ezh2		Arid3a
Zscan18		Rnf170
Chd2		Helz2
Gm3667		C3
Scd2		Bcl7a
Thap12		Cmpk2
Plaur		Gm42372
Klhl2		Zfp976
Numa1		Gm29264
Tnfsf8		AC163032.1
Rhoh		Zfp367
Zfp760		Aldh1l2
Ighm		Gm9889
Pmf1		Syne2
Fbxo30		Gbp2
Dhdh		Mtus2
Slc38a2		Ccl7
Upk1b		Mlf1
3110040N11Rik		Cr2
Ppa1		Dusp5
Cnksr3		Gm28731
Nudcd1		Rad54l
D3Ertd751e		Kcnj10
B3gnt7		Gabrb1
Zfp763		Galnt7
Sdhaf3		Gm40155
Guf1		Fgd6
Mthfd1l		Zcwpw1
Aldh6a1		Gm16192
B3galt5		Ttr
A930033H14Rik		Chic1
Iqcb1		Hs3st3b1
Zfyve28		Slc6a6
Mum1		Gm26772
Speg		Gm16118
Zfp619		Cdc25a
Nhsl2		Fbxo5
Dffa		Ccnd2
Tmem71		Zfp52
Gm3636		Snupn
Dph6		Spef2
4933406P04Rik		1500002C15Rik
Gin1		Hist1h2bc
Tob1		Zc3h6
Gm26735		Slfn2
Cnn2		Kif15
Slc13a3		Kcnd3
Atat1		Dlg3
Sirt3		Lnpep
Tmem138		Sv2a
Prmt6		Mex3b
Peg10		Lhfpl4
Olfm4		Ninl
Zfp553		A630089N07Rik
Zfp518a		Olfr156
Zfp606		Ciart
Sp100		Adora1
Ckap5		Zmynd11
Tmtc4		Gm13710
Xrcc5		Zbtb44
2010315B03Rik		H2-Ab1
Ikzf5		Chst1
Gm29367		Hist1h2ak
Ccdc90b		Efnb2
Slc18b1		Zdhhc2
Mettl18		4930513N10Rik
Gm17056		Plagl2
Sorl1		Clec1a
Ero1l		Gm14296
Zfp568		Gphn
Chst1		Chst2
Sik3		Dnajc21
Tbc1d4		Zfp595
Tpgs2		Nhs
Tmem67		Gin1
Klrd1		Bora
Tiam1		Gcc2
Pcgf5		Ncapg2
Pgap1		Dqx1
Ropn1l		Dck
Phf13		Lilr4b
Uevld		Rbms1
Hist2h4		Fancm
Zc3h6		Gpr82
Pmepa1		Pcgf5
Tefm		Abl2
Elavl4		Fggy
Rbmx2		Smc4
Map3k20		Zfp704
Bach2os		Smarca4
Vim		Rbmx2
Pde12		Ttf1
Camta1		Fam126b
Nipa1		A430106G13Rik
Zscan12		Trim7
Dis3l2		Kcnj2
Phlda1		Hist1h2bn
Plk4		Atad5
Gm3164		Lox
Gemin2		Zbtb34
Gm29340		Gpd2
Wdr41		Fam13a
Ninl		Platr25
Zfp101		Zfp961
Fam60a		Galnt6
Rai14		Zbtb11
Treml2		Cybb
Pla2g16		Wdr76
Pyroxd1		Srgap3
Il1rl1		Sntb2
Mlycd		Ptchd1
Cstf2		Isg20
Gadd45b		Alms1
Thap2		Slc2a3
Stau2		Cast
Tlcd2		Mzf1
Hnrnph1		Abcb7
Ttl		Zdhhc21
Sacs		Upf3b
Phtf2		Agbl3
Efnb1		Xdh
Serpinb9		Map1b
Tfrc		Adarb1
Ptpn21		mt-Atp8
Zfp827		Gen1
Il7r		2410080I02Rik
Nek1		Clspn
Utrn		Itga4
Dmrtb1		Nin
Polr2l		Zscan29
Spp1		Tecpr2
Nr4a1		Fxn
Dtd1		Kif3a
Hspa1b		Nim1k
Zmym1		Zfp229
Unkl		Pola2
Il4i1		Chst11
Cdkn2c		Nudcd1
2610301B20Rik		Oxsm
Cmya5		Asb7
Map7		Prkg1
Foxo4		1110019D14Rik
Adssl1		Nes
Hus1		Hspa12a
Gcfc2		Gm36445
Fyn		Gm13383
2310068J16Rik		Pik3ip1
AC165953.2		Kynu
Bbs4		Kctd12b
Fzd4		Arhgap18
Blm		Sema6d
2310040G24Rik		Clic4
Styx		Kdm7a
Coasy		Shc4
Fxn		BC024063
Cbx8		Jmy
Rccd1		Akap9
Zrsr1		Tulp3
Dsel		Naa25
Hmgn3		Trim30c
Cptp		Usf3
Zfp946		Arfgef1
Cdc42bpa		Gm42047
Pde4b		Micu3
Pxmp4		Sacs
Urb2		Tsc22d1
Pter		Trim33
Gramd1b		A130077B15Rik
Nup107		Gbp5
Hlf		Pola1
Zfp866		Phf11a
Asb1		Mical2
Bex3		Adgre5
Dhx37		Cd300ld
Slc2a9		Bloc1s6os
AC160336.1		Cst7
Pxdc1		Fam19a1
Gm47123		Poc5
4833445I07Rik		Gm16578
Ccdc122		Dzip3
Sesn3		Ttyh1
Gm28731		Sned1
Zfp697		Ptger4
Twsg1		Pi4k2b
Carf		Egf
Zfp937		Ccl5
Itgax		Nanos1
Ccr1		Mbd4
Mxra8		Dock11
Eml5		Treml2
C130050O18Rik		Wfdc17
Gimap9		Mr1
Selenoh		Tcap
Rubcn		Plac8
Ccnb1ip1		Hist1h2bh
4833418N02Rik		Bhlhe40
Rnf213		Slamf8
Psat1		Bcar3
Trp53inp1		Rell1
Clgn		Ift88
Slc35d1		Stag3
2310039H08Rik		Gm29927
Psip1		Fads1
St6galnac6		Elavl4
Serpine1		Epm2aip1
Fam92a		Erich1
Ctnnd2		Runx1t1
Zfp976		Pomc
Nanos1		Palb2
Rpap3		Hist1h2ai
3830403N18Rik		2010015M23Rik
Prox1		Haus8
Zfp692		Riok1
Naif1		Slf2
Utp4		Stx3
Cenpq		Pcmtd1
Zfp710		Atad2
Mtmr1		Osbpl11
Trim12c		Hbegf
Rpgrip1l		Cep57l1
Actn1		Npat
Gapt		Socs1
Cpq		Optn
6430548M08Rik		Ropn1l
Tctex1d4		Eif3a
Wdr60		A930033H14Rik
1500015A07Rik		Asxl2
Klf10		Jaml
Galm		Gdpd3
Fam206a		Lin9
Pls3		Zfp51
Mphosph9		Ccdc73
Gm15853		Klhl3
Ascc3		Man2a1
Snx16		Phkg1
Pi4k2b		Tex9
Ccl7		Ifit1
Ick		Iqgap3
Nsl1		Zfp612
Slc11a2		Lgals3
Cyb5rl		Usp37
Mlh3		Dmrtb1
Itga4		Acad12
Ttf2		Traf3ip1
Lrrc28		Bach2os
Samd15		Megf9
Clec1a		Il1b
2310057M21Rik		Fgf13
Zfp667		Mre11a
Trim23		Gadd45a
S100a1		Rsad2
Gstcd		Letm2
Hspb11		Afdn
Slx1b		Ifi207
Dhx40		Gm15880
Zfp874b		Casz1
Gm26609		Hist1h1a
Reep4		Gm43254
Acad12		Trim37
Pctp		Baz1a
Rida		Mlh3
Rora		Paip2b
[truncated: 1,001 more rows]
